# Supplementary material for: Klinische Wirksamkeit der aurikulären Vagusnervstimulation in der Behandlung chronischer und akuter Schmerzen
Source: Springer Nature journal article supplement (doi:10.1007/s00482-022-00686-2), 2023-01-02
Supplement: MOESM1 [file 23881522]

Tab. 2 Zusammenfassung und Analyse der Studien zur Anwendung der avNS bei chronischen Schmerzen, akuten postoperativen Schmerzen und akuten experimentellen Schmerzen - Langversion. <sup>a</sup>

| Studie                                | Indikation                  | Methode <sup>b</sup>                                                                                      | Probandenanzahl (Dropouts)              | Stimulationsparameter                                                                                               | Behandlungsdauer                         | Primäres Ergebnis <sup>c</sup>                                                                                                                   | Sekundäres Ergebnis                                                                                                                                                              | Unerwünschte Ereignisse         |
|---------------------------------------|-----------------------------|-----------------------------------------------------------------------------------------------------------|-----------------------------------------|---------------------------------------------------------------------------------------------------------------------|------------------------------------------|--------------------------------------------------------------------------------------------------------------------------------------------------|----------------------------------------------------------------------------------------------------------------------------------------------------------------------------------|---------------------------------|
| <b>chronischer Schmerz</b>            |                             |                                                                                                           |                                         |                                                                                                                     |                                          |                                                                                                                                                  |                                                                                                                                                                                  |                                 |
| Sator-Katzenschlager et al. 2003 [66] | chronisches Zervikalsyndrom | pVNS: 2 x Antitragus, <u>Fossa triangularis</u> ; rechts oder links vs. Sham-pVNS: inaktives Gerät        | n=23<br>pVNS=10 (1)<br>Sham-pVNS=11 (1) | P-Stim (Biegler)<br>Rechteck, monophasisch, alternierende Polarität, 1 Hz, 1 ms, 2 mA (3.8V) konstant, 3h ON/3h OFF | 48h/W für 6 Wochen<br>4 Woche Follow-Up  | signifikante Reduktion <b>VAS</b> Schmerzskala (pVNS vs. Sham, p<0.05)<br>signifikante Reduktion blieb über <b>4 Wochen FU</b> (p<0.05) erhalten | signifikante Verbesserungen bei <b>psychischem Wohlbefinden, Aktivität, und Schlaf</b> (pVNS vs. Sham, p<0.05)<br><b>Schmerzmittelbedarf</b> signifikant niedriger pVNS vs. Sham | keine behandlungsrelevanten UEs |
| Sator-Katzenschlager et al. 2004 [65] | chronischer Kreuzschmerz    | pVNS: <u>Antihelix, Fossa triangularis</u> , Antitragus, rechts oder links vs. Sham-pVNS: inaktives Gerät | n=61<br>pVNS=29 (2)<br>Sham-pVNS=26 (4) | P-Stim (Biegler)<br>Rechteck, monophasisch, alternierende Polarität, 1 Hz, 1 ms, 2 mA (3.8V) konstant, 3h ON/3h OFF | 48h/W für 6 Wochen<br>3 Monate Follow-Up | signifikante Reduktion <b>VAS</b> Skala (p-VNS vs. Sham, p<0.05)<br>signifikante Reduktion blieb über <b>3 Monate FU</b> (p<0.05) erhalten       | signifikante Verbesserungen bei <b>psychischem Wohlbefinden, Aktivität, und Schlaf</b> (pVNS vs. Sham (p<0.05)<br><b>Schmerzmittelbedarf</b> signifikant niedriger pVNS vs. Sham | keine behandlungsrelevanten UEs |

|                          |                                              |                                                                                                                                                                 |                                                       |                                                                                                                                                                                             |                                                 |                                                                                                                                                                                          |                                                                                                                                                                                                                                                             |                                                                                                                                                              |
|--------------------------|----------------------------------------------|-----------------------------------------------------------------------------------------------------------------------------------------------------------------|-------------------------------------------------------|---------------------------------------------------------------------------------------------------------------------------------------------------------------------------------------------|-------------------------------------------------|------------------------------------------------------------------------------------------------------------------------------------------------------------------------------------------|-------------------------------------------------------------------------------------------------------------------------------------------------------------------------------------------------------------------------------------------------------------|--------------------------------------------------------------------------------------------------------------------------------------------------------------|
| Kong et al. 2009 [39]    | chronischer Schmerz (Spondylose, Migräne)    | pVNS: 3 aus <u>Fossa triangularis</u> , <u>Crus superius antihelicis</u> , Antitragus, <u>Crus inferius antihelicis</u> , <u>Conchae</u> , rechts oder links    | n=9<br>(Migräne n=2, Spondylose n=7)<br>pVNS=6 (3)    | P-Stim (Biegler)<br><br>Rechteck, monophasisch, alternierende Polarität, 1 Hz, 1 ms, 3.8V (2 mA) konstant, 3h ON/3h OFF                                                                     | 4 Tage/W für 2 Wochen<br><br>2 Wochen Follow-Up | VAS-Reduktion von 7 (Behandlungsstart) auf 4 (Woche 1), 2 (Woche 2), bzw. 3 (Woche 4) (jeweils Wochen-Mittelwerte)<br><br>Verbesserungen blieben für bis zu 2 Wochen nachhaltig bestehen | k.A.                                                                                                                                                                                                                                                        | lokaler Schmerz an Stimulationspunkt (n=3)<br>Übelkeit (n=2)<br>Schwindel (n=1)<br>lokaler Juckreiz (n=2)                                                    |
| Napadow et al. 2012 [53] | chronischer Beckenschmerz (CPP)/Endometriose | tVNS (Atemsynchron): <u>Cymba Conchae</u> , zw. <u>Antihelix</u> und <u>Cavum Conchae</u> , links<br>vs.<br>Sham-tVNS (nicht Atemsynchron): Ohrfläppchen, links | n=18<br><br>tVNS=15 (3)                               | Cefar Acus II (Cefar Medical)<br><br>Rechteck, 30 Hz, 0.45 ms, Amplitude individuell auf deutliche Wahrnehmbarkeit angepasst, Stimulation synchronisiert/nicht synchronisiert mit Ausatmung | 30 Minuten                                      | Trend zu reduzierter Schmerzintensität unter tVNS (Atemsynchron) vs. Sham-tVNS (nicht Atemsynchron)                                                                                      | keine signifikanten Veränderungen oder Unterschiede auf NRS-Schmerskala<br><br>tVNS (Atemsynchron) bewirkte signifikant stärkere <b>Abnahme</b> der <b>Angst</b> -Werte vs. Ausgangswert (p<0.01) und vs. Sham-tVNS (nicht Atemsynchron, p<0.05)            | k.A.                                                                                                                                                         |
| Straube et al. 2015 [70] | chronische Migräne                           | tVNS (25 Hz): <u>Cymba Conchae</u> , links<br>vs.<br>tVNS (1 Hz): <u>Cymba Conchae</u> , links                                                                  | n=46<br><br>tVNS (25 Hz)=22 (2)<br>tVNS (1 Hz)=17 (5) | NEMOS (Cerbomed)<br><br>Rechteck, biphasisch, 25 Hz bzw. 1 Hz (Kontrolle), 0.25 ms, Amplitude individuell auf max. tolerierbare Wahrnehmbarkeit, 30s ON/30s OFF                             | 4h/T für 3 Monate                               | signifikant größere Reduktion an <b>Kopfschmerztagen/ 28 Tage</b> tVNS (1Hz) vs. tVNS (25Hz) (p=0.035)                                                                                   | Prozentsatz Responder 29.4% vs. 13.6% (1Hz vs. 25 Hz, Per Protokoll Analyse)<br><br>keine signifikante Veränderung der Kopfschmerzintensität ggb. Ausgangswert und 1Hz vs. 25 Hz<br><br><b>Kopfschmerzmedikationstage, MIDAS</b> und <b>HIT-6</b> in beiden | milder bis moderater Schmerz, Parästhesie, oder Pruritus während oder nach der Stimulation; Erythem, Ulzeration oder Schorf<br><br>Behandlungsrelevante UEs: |

|                        |                                                |                                                                                            |                                                                           |                                                                                                                         |                                        |                                                                                                  |                                                                                                                                                                                                                                                                                                   |                                                                                  |
|------------------------|------------------------------------------------|--------------------------------------------------------------------------------------------|---------------------------------------------------------------------------|-------------------------------------------------------------------------------------------------------------------------|----------------------------------------|--------------------------------------------------------------------------------------------------|---------------------------------------------------------------------------------------------------------------------------------------------------------------------------------------------------------------------------------------------------------------------------------------------------|----------------------------------------------------------------------------------|
|                        |                                                |                                                                                            |                                                                           |                                                                                                                         |                                        |                                                                                                  | Gruppen signifikant reduziert ggb. Ausgangswert, keine Unterschiede zwischen den Gruppen                                                                                                                                                                                                          | n=112, davon n=76 tVNS-induziert (25 Hz); n=67, davon n=39 tVNS-induziert (1 Hz) |
| Sacco et al. 2016 [62] | Chemotherapie-induzierte periphere Neuropathie | pVNS: <u>Fossa Triangularis</u> , <u>Tragus</u> , <u>Antihelix</u> und/oder <u>Conchae</u> | n=58<br>pVNS=58 (0)<br>primärer Endpunkt=18<br>sekundärer Endpunkt=32 (8) | P-Stim (Biegler)<br><br>Rechteck, monophasisch, alternierende Polarität, 1 Hz, 1 ms, 3.8V (2 mA) konstant, 3h ON/3h OFF | 5 Tage/W für durchschnittlich 5 Wochen | signifikante Verbesserung ggb. Ausgangswert um 5 Punkte (Median) auf <b>NRS</b> -Skala (p<0.001) | 59% deutliche Schmerzreduktion, 12.4% bemerkbare Schmerz- und Taubheitsgefühlreduktion, 29% Non-Responder<br><br>nachhaltiger Therapieeffekt bei allen Respondern<br><br>funktionelle Verbesserungen insbesondere bei ADL, Gang und Balance<br><br>Reduktion/Absetzen der Schmerzmedikation (n=6) | Stimulation nicht tolerierbar (n=1)                                              |

|                          |                                                         |                                                                                                                                                                        |                                                  |                                                                                                                                                                         |                                                                                                    |                                                                                                                                                |                                                                                                                                                                                                                                                                                                                                         |                                                                                                                               |
|--------------------------|---------------------------------------------------------|------------------------------------------------------------------------------------------------------------------------------------------------------------------------|--------------------------------------------------|-------------------------------------------------------------------------------------------------------------------------------------------------------------------------|----------------------------------------------------------------------------------------------------|------------------------------------------------------------------------------------------------------------------------------------------------|-----------------------------------------------------------------------------------------------------------------------------------------------------------------------------------------------------------------------------------------------------------------------------------------------------------------------------------------|-------------------------------------------------------------------------------------------------------------------------------|
| Kovacic et al. 2017 [40] | chronischer Unterleibschmerz<br>Jugendliche 11-18 Jahre | pVNS: Ohrläppchen, <u>Fossa triangularis/Crus superius antihelicis, Conchae</u> (posterior), temporale Region (nicht in der Ohrmuschel) vs. Sham-pVNS: inaktives Gerät | n=115<br>pVNS=57 (3/FU7)<br>Sham-pVNS=47 (8/FU4) | Neuro-Stim (Innovative Health Solutions)<br><br>Rechteck, 1/10 Hz alternierend alle 2s, 1 ms, 3.2 V konstant, 2h ON /2h OFF                                             | 5 Tage/W für 4 Wochen<br><br>Follow-Up 8-12 Wochen<br><br>Fragebogen 6-12 Monate nach Therapieende | Nach 3 Wochen: Reduktion schwerer Schmerzen, <b>PFSD</b> (pVNS vs. Sham, p<0.0001)<br><br>Behandlungseffekt blieb bis inkl. <b>FU</b> bestehen | FDI-Skala: keine Veränderung bei Sham ggb. Ausgangswert (moderate Einschränkungen, beide Zeitpunkte)<br><br><b>FDI-Skala</b> : signifikante Verbesserung bei pVNS ggb. Ausgangswert, moderate Einschränkungen vs. minimale Einschränkungen, Verbesserung um durchschnittlich 36%<br><br>keine Veränderungen im STAI-C in beiden Gruppen | Ohr-Diskomfort (pVNS/Sham n=3/3)<br>Allergie gegen Klebstoff (pVNS/Sham n=3/2)<br>Synkope durch Nadelphobie (pVNS/Sham n=0/1) |
| Grolaux et al. 2019 [30] | IBS-Schmerz und chronischer Schmerz                     | tVNS: <u>Conchae</u> , links                                                                                                                                           | n=6<br>tVNS=6 [IBS=3, chron. Schmerz=3] (0)      | TU7000 (Digital TENS, RMP)<br><br>Rechteck, biphasisch, (chronischer Schmerz: 5 Hz, 0.2 ms) / (IBS: 3 Hz, 0.25 ms), Amplitude individuell auf Wahrnehmbarkeit (~0.8 mA) | 2 x 30 Min/W für 4 Wochen<br><br>Follow-Up nach 2 Monaten                                          | keine signifikanten Änderungen im BPI-Fragebogen (Kurzform)<br><br>klinische Verbesserung (IBS-SSS) bei der IBS-Gruppe beobachtbar             | k.A.                                                                                                                                                                                                                                                                                                                                    | Nackenschmerz (n=6)<br>Juckreiz an Stimulationsstelle (n=2)<br>Übelkeit (n=2)<br>Kopfschmerz (n=3)                            |

|                            |             |                                                                                                                |                                         |                                                                                                                  |                                   |                                                                                                                                                                                                                                                                                                |                                                                                                                                                                                                                                                                                                                                                            |                                |
|----------------------------|-------------|----------------------------------------------------------------------------------------------------------------|-----------------------------------------|------------------------------------------------------------------------------------------------------------------|-----------------------------------|------------------------------------------------------------------------------------------------------------------------------------------------------------------------------------------------------------------------------------------------------------------------------------------------|------------------------------------------------------------------------------------------------------------------------------------------------------------------------------------------------------------------------------------------------------------------------------------------------------------------------------------------------------------|--------------------------------|
| Krasaelap et al. 2019 [41] | IBD-Schmerz | pVNS: <u>Fossa triangularis</u> , <u>Cymba Conchae</u> , Ohrläppchen (Referenz) vs. Sham-pVNS: inaktives Gerät | n=50<br>pVNS=27 (0)<br>Sham-pVNS=23 (0) | Neuro-Stim (Innovative Health Solutions)<br><br>Rechteck, 1/10 Hz alternierend alle 2s, 1 ms, 3.2V, 2h ON/2h OFF | 5 Tage/W für 4 Wochen             | 59% der Patient*innen in der aktiven Therapiegruppe vs. 26% in der Sham-Gruppe erreichten eine Reduktion $\geq 30\%$ bei <b>schweren abdominalen Schmerzen</b> (Ausgangswert vs. 3 Wochen Therapie, $p=0.024$ )                                                                                | nach 3 Wochen <b>zusammengesetzte Schmerzskala</b> Reduktion pVNS vs. Sham-pVNS ( $p=0.026$ )<br><br>nach 3 Wochen <b>üblicher Schmerz</b> Reduktion pVNS vs. Sham-pVNS ( $p=0.029$ )<br><br>Verbesserung bei <b>allgemeinen/globalen Symptomen</b> pVNS vs. Sham-pVNS ( $p<0.001$ )                                                                       | Allergie gegen Klebstoff (n=1) |
| Mion et al. 2020 [49]      | IBS-Schmerz | tVNS: <u>Conchae</u> , links                                                                                   | n=12<br>tVNS=9 (3)                      | Urostim 2 (Schwa-medico)<br><br>Rechteck, 30 Hz, 0.25 ms, 0.5-20 mA (individuell unter Wahrnehmungsschwelle)     | 3h/Tag für 5 T/Woche für 6 Monate | signifikante Verringerung beim <b>IBS-SSS</b> nach 3 ( $p = 0.0084$ ) und 6 Monaten ( $p = 0.0209$ ) ggb. Ausgangswert<br><br>klinisch signifikantes Ansprechen (min. 30% Reduktion im IBS-SSS) bei 5 Patient*innen nach 3 Monaten (2 IBS-D, 3 IBS-C), bei 4 nach 6 Monaten (2 IBS-C, 2 IBS-D) | <b>Schwere und Frequenz des abdominalen Schmerzes</b> signifikant geringer nach 1 Monat tVNS und bis 6 Monate ( $p<0.03$ )<br><br>keine signifikanten Veränderungen bei QoL - SF-36, psychologischem Wohlbefinden - PANAS, STAI, CES-DS, PSS, WCC;<br>inflammatorischen Zytokine und fäkalem Calprotectin<br><br>Begleitmedikation konnte reduziert werden | keine                          |

|                        |                                        |                                                                                                            |                                                   |                                                                                                                               |                                 |                                                                                                                                                                                                                        |                                                                                                                                                                                                                                                                                                                                                           |       |
|------------------------|----------------------------------------|------------------------------------------------------------------------------------------------------------|---------------------------------------------------|-------------------------------------------------------------------------------------------------------------------------------|---------------------------------|------------------------------------------------------------------------------------------------------------------------------------------------------------------------------------------------------------------------|-----------------------------------------------------------------------------------------------------------------------------------------------------------------------------------------------------------------------------------------------------------------------------------------------------------------------------------------------------------|-------|
| Kutlu et al. 2020 [43] | Fibromyalgie                           | physisches Training + tVNS: <u>Tragus</u> und <u>Conchae</u> , bilateral vs. physisches Training           | n=60<br>tVNS + Training=27 (3)<br>Training=25 (5) | TENS-Gerät<br><br>biphasisch, asymmetrisch, 10 Hz, 0.5 ms, Amplitude individuell (Wahrnehmungsschwelle)                       | 30 Min/T, 5 Tage/W für 4 Wochen | beide Gruppen zeigten statistisch signifikante Verbesserungen bei Schmerz ( <b>VAS</b> ), Depression ( <b>Beck Depression Scale</b> ), <b>Angst</b> , <b>Funktionalität</b> , und im <b>Life Quality Score</b> (SF-36) | k.A.                                                                                                                                                                                                                                                                                                                                                      | keine |
| Shi et al. 2021 [69]   | IBS-C, chronischer abdominaler Schmerz | tVNS: <u>Cymba</u> <u>Conchae</u> , bilateral vs. Sham (nicht aurikuläre Stimulation): Ellbogen, bilateral | n=42<br>tVNS=21 (0)<br>Sham=19 (2)                | SNM-FDC01 (Ningbo Maida Medical Device)<br><br>Rechteck, 25 Hz, 0.5 ms, 0–2 mA (maximal tolerierbare Amplitude), 2s ON/3s OFF | 2x30 Min/T für 4 Wochen         | tVNS erhöhte signifikant <b>CSBMs/Woche</b> (p=0.001) und reduzierte signifikant den <b>VAS</b> -Wert von abdominalen Schmerzen (p=0.001) vs. Sham                                                                     | tVNS vs. Sham: verbesserte <b>Lebensqualität</b> (p=0.020), verringerter <b>IBS-SSS</b> (p=0.001)<br><br>verbesserter <b>rektoanaler inhibitorischer Reflex</b> (p=0.014), verbesserte <b>rektale Empfindlichkeit</b> (p<0.04); niedrigere Level an proinflammatorischen Zytokinen und Serotonin<br><br>verstärkte <b>vagale Aktivität</b> (EKG, p=0.040) | keine |

|                           |                                                   |                                                                                                                               |                                        |                                                                                                                           |                                                  |                                                                                                                                                                                                                                                                                                                       |                                                                                                                                                                                                                                                                          |                                                                                                                                                                                      |
|---------------------------|---------------------------------------------------|-------------------------------------------------------------------------------------------------------------------------------|----------------------------------------|---------------------------------------------------------------------------------------------------------------------------|--------------------------------------------------|-----------------------------------------------------------------------------------------------------------------------------------------------------------------------------------------------------------------------------------------------------------------------------------------------------------------------|--------------------------------------------------------------------------------------------------------------------------------------------------------------------------------------------------------------------------------------------------------------------------|--------------------------------------------------------------------------------------------------------------------------------------------------------------------------------------|
| Széles et al. 2021 [71]   | Behandlungs-resistenter chronischer Rückenschmerz | pVNS: <u>Cymba Conchae</u> , <u>Conchae</u> , <u>Crus antihelicis</u> , links und rechts alternierend                         | n=148<br>pVNS=148 (0)                  | P-Stim (Biegler)<br><br>Rechteck, monophasisch, alternierende Polarität, 1 Hz, 1 ms, 3.8V (2 mA) konstant, 3h ON/3h OFF   | 4 Tage/W für mind. 3 Wochen und bis zu 3 Monate  | ≥30% Reduktion der durchschnittlichen <b>NRS</b> -Schmerzintensität (ITT): 51.4% (Woche 1), 70.3% (Woche 3), 72.3% (Woche 6), 75.0% (3 Monate)<br><br>ITT-Population: 32.4% erreichten ≥ 50% Verbesserung (Definition Responder) der durchschnittlichen Schmerzintensität (Woche 1), 49.3% (Woche 3), 58.8% (Woche 6) | subjektives Wohlbefinden: Verbesserung um durchschnittlich 1.89 Punkte (±1.66; n=54)<br><br>49.3% reduzierten oder beendeten ihre Schmerzmedikation (n=67)<br><br>verbesserte Mobilität (n=20), verbesserte Schlafqualität (n=3), Reduktion psychischer Anspannung (n=1) | unbeabsichtigtes Lösen des Gerätes (n=20)<br>unbeabsichtigte Unterbrechung der Stimulation (n=15)<br>Hautirritationen (n=4)<br>Schwindel/Kopfweh/Schmerz an Stimulationsstelle (n=1) |
| Aranow et al. 2021 [5]    | SLE und muskuloskelettaler Schmerz                | tVNS: <u>Conchae</u> (anterior und posterior) vs. Sham-tVNS: Ohrläppchen, inaktives Gerät                                     | n=18<br>tVNS=12 (0)<br>Sham-tVNS=6 (0) | TENS 7000 (Roscoe)<br><br>Rechteck, 30 Hz, 0.3 ms, maximal tolerierbare Amplitude                                         | 5 Min/T für 4 Tage                               | tVNS bewirkte signifikante Reduktion bei <b>Schmerz</b> und <b>Müdigkeit</b> vs. Sham-tVNS                                                                                                                                                                                                                            | PtGA-Werte, Anzahl geschwollener/betroffener Gelenke und PGA-Werte tVNS vs. Sham-tVNS verbessert<br><br>Effekte blieben bis Tag 12 bestehen<br><br>Plasmakonzentration von <b>Substanz P</b> signifikant reduziert tVNS ggb. Ausgangswert                                | keine                                                                                                                                                                                |
| Woodbury et al. 2021 [79] | Fibromyalgie                                      | pVNS: <u>Conchae</u> (posterior), <u>Crus helicis</u> , <u>Crus superius antihelicis</u> , Ohrläppchen, rechts oder links vs. | n=21<br>pVNS=12 (0)<br>Kontrolle=9 (0) | NSS (EAD MFS, BRIDGE; Innovative Health Solution)<br><br>Rechteck, 1/10 Hz alternierend alle 2s, 3.2V, 1 ms, 2h ON/2h OFF | 5 Tage/W für 4 Wochen<br><br>12 Wochen Follow-Up | nicht-signifikante Verbesserung auf der Schmerzskala pVNS vs. Kontrolle<br><br>signifikante Verbesserungen bei <b>Schlaf</b> , <b>Aktivität</b> ,                                                                                                                                                                     | im fMRI feststellbare verstärkte Gehirnkonnektivität (Cerebellum, in exekutiven Kontrollnetzwerken) in der pVNS-Gruppe nach                                                                                                                                              | Leichte Irritationen an Stimulationsstelle (n=2)                                                                                                                                     |

|                         |                       | Standardtherapie                                                       |                                         |                                                                                |                                                                            | <b>Stimmung</b> in Woche 6 in pVNS-Gruppe vs. Kontrolle                                                                                                                                                                                                                                             | Behandlung vs. Kontrolle                                                                                                                                                                                                                                                                                                      |                                                                                                              |
|-------------------------|-----------------------|------------------------------------------------------------------------|-----------------------------------------|--------------------------------------------------------------------------------|----------------------------------------------------------------------------|-----------------------------------------------------------------------------------------------------------------------------------------------------------------------------------------------------------------------------------------------------------------------------------------------------|-------------------------------------------------------------------------------------------------------------------------------------------------------------------------------------------------------------------------------------------------------------------------------------------------------------------------------|--------------------------------------------------------------------------------------------------------------|
| Marsal et al. 2021 [46] | Rheumatoide Arthritis | tVNS: <u>Cymba Conchae</u>                                             | n=30<br>tVNS=27 (3)                     | Nësos<br>Rechteck, 20 kHz, Amplitude individuelle Wahrnehmungsschwelle (~3 mA) | 30 Min/T für 12 Wochen<br>Follow-Up: W1, W2, W4, W8, W12 (Therapieverlauf) | nach Woche 12 signifikante Änderung im <b>DAS28-CRP</b> (p<0.0001) ggb. Ausgangswert                                                                                                                                                                                                                | Reduktion <b>HAQ-DI</b> (p<0.0001) ggb. Ausgangswert                                                                                                                                                                                                                                                                          | Hautabschürfung (n=1);<br>klassifiziert als nicht Behandlungsrelevant:<br>Sturz (n=2)<br>Mucus im Hals (n=1) |
| Zhang et al. 2021 [84]  | Migräne ohne Aura     | tVNS: <u>Cymba Conchae</u> , links vs. Sham-tVNS: Cauda helices, links | n=63<br>tVNS=33 (1)<br>Sham-tVNS=26 (3) | SDZII (Huatuo)<br>Rechteck, 1 Hz, 0.2 ms, maximal tolerierbare Amplitude       | 30 Min/Einheit, 12 Einheiten in 4 Wochen                                   | signifikante Reduktion bei <b>Anzahl der Migränetage</b> (p<0.05), <b>Schmerzintensität</b> (p<0.01), und <b>Dauer der Migräneattacken</b> (p<0.05) tVNS vs. Sham-tVNS nach 4 Wochen Behandlung<br><br>signifikante Reduktion der <b>Migränetage</b> in der tVNS-Gruppe ggb. Ausgangswert (p<0.001) | funktionelle Konnektivitätsanalyse im fMRI: tVNS erhöht die Konnektivität zwischen motorisch-verknüpften Thalamus-Subregionen und dem anterior cingulate Cortex/medialen präfrontalen Cortex, während die Konnektivität zwischen occipital-verknüpfter Thalamus-Subregion und postzentralem Gyrus/Präcuneus herabgesetzt wird | k.A.                                                                                                         |

|                           |                            |                                                                                  |                                        |                                                                                                                                    |                                            |                                                                                                                                                                                                                          |                                                                                                                                                                                                             |                         |
|---------------------------|----------------------------|----------------------------------------------------------------------------------|----------------------------------------|------------------------------------------------------------------------------------------------------------------------------------|--------------------------------------------|--------------------------------------------------------------------------------------------------------------------------------------------------------------------------------------------------------------------------|-------------------------------------------------------------------------------------------------------------------------------------------------------------------------------------------------------------|-------------------------|
| Feng et al. 2022 [24]     | Migräne ohne Aura          | tVNS: <u>Cymba Conchae</u> , links<br>fMRI-Kontrollgruppe mit gesunden Probanden | n=60<br>tVNS=60 (0)<br>Kontrolle=60(0) | SDZII (Huatuo)<br><br>Rechteck, 1 Hz, 0.2 ms, maximal tolerierbare Amplitude (1.5-5 mA)                                            | 30 Min/Einheit, 12 Einheiten über 4 Wochen | signifikante Verbesserung <b>VAS</b> , <b>Attackenanzahl</b> , <b>Dauer</b> , <b>MSQ</b> , <b>SDS</b> , <b>SAS</b> (p<0.05) ggb. Ausgangswert<br><br>keine signifikanten Veränderungen bei Notfallmedikation (Ibuprofen) | im fMRI: Veränderungen im rechten PoCG nach tVNS negativ assoziiert mit VAS-Reduktion, im bilateralen Präcuneus positiv assoziiert mit Dauer von Migräneattacken                                            | k.A.                    |
| Courties et al. 2022 [17] | Osteoarthritis/Handschmerz | tVNS: <u>Cymba Conchae</u> , links                                               | n=20<br>tVNS=18 (2)                    | TENSeco 2 (Schwa-Medico)<br><br>biphasisch, asymmetrisch, balanciert, 25 Hz, 0.05 ms; Amplitude bis 15 mA bzw. maximal tolerierbar | 1h/T für 4 Wochen                          | signifikante Reduktion des <b>VAS</b> ggb. Ausgangswert (p=0.001)                                                                                                                                                        | signifikante Reduktion bei <b>FIHOA</b> (p = 0.01)<br><br>12 Patient*innen hatten weniger schmerzende Gelenke, 15 weniger geschwollene Gelenke<br><br>keine signifikante Veränderung bei Paracetamol Bedarf | Diskomfort am Ohr (n=1) |

|                           |                                                                           |                                                                                                                                           |                         |                                                                                                                            |                       |                                                                                                                                                                                                                                                                                                                                                                                                                                                                             |                                                                                           |      |
|---------------------------|---------------------------------------------------------------------------|-------------------------------------------------------------------------------------------------------------------------------------------|-------------------------|----------------------------------------------------------------------------------------------------------------------------|-----------------------|-----------------------------------------------------------------------------------------------------------------------------------------------------------------------------------------------------------------------------------------------------------------------------------------------------------------------------------------------------------------------------------------------------------------------------------------------------------------------------|-------------------------------------------------------------------------------------------|------|
| Santucci et al. 2022 [64] | chronischer funktioneller Unterleibschmerz<br><br>Jugendliche 11-18 Jahre | pVNS: Ohrläppchen, <u>Fossa triangularis/Crus superioris antihelicis, Conchae</u> (posterior), temporale Region (nicht in der Ohrmuschel) | n=20<br><br>pVNS=19 (1) | IB-Stim (Innovative Health Solutions)<br><br>Rechteck, 1/10 Hz alternierend alle 2s, 1 ms, 3.2V konstant, 2h ON/35 Min OFF | 5 Tage/W für 4 Wochen | <p>WL-SPT-induzierte <b>VAS</b> (p=0.004) und <b>Übelkeit</b> (0.02) geringer ggb. Ausgangswert;</p> <p><b>Ruhe-VAS</b> (p=0.03), <b>abdominaler Schmerz</b> (p&lt;0.0001), <b>Schmerz Katastrophierung</b> (p=0.0004), <b>somatische Beschwerden</b> (p=0.01), <b>funktionelle Einschränkungen</b> (p=0.04), und <b>Ängstlichkeit</b> (p=0.02) zeigten signifikante Verbesserungen ggb. Ausgangswert</p> <p>einige Effekte langanhaltend für 6-12 Monate nach Therapie</p> | <b>Schlaf</b> (p<0.05) und <b>Einschlaf latenz</b> (p=0.03) verbesserten sich signifikant | k.A. |
|---------------------------|---------------------------------------------------------------------------|-------------------------------------------------------------------------------------------------------------------------------------------|-------------------------|----------------------------------------------------------------------------------------------------------------------------|-----------------------|-----------------------------------------------------------------------------------------------------------------------------------------------------------------------------------------------------------------------------------------------------------------------------------------------------------------------------------------------------------------------------------------------------------------------------------------------------------------------------|-------------------------------------------------------------------------------------------|------|

**akuter postoperativer Schmerz**

|                                              |                                                              |                                                                                                                                                                                   |                                                                               |                                                                                                                                                    |                                                            |                                                                                                                                                    |                                                                                                                                                                                                                                                                                                                                                                               |                                                 |
|----------------------------------------------|--------------------------------------------------------------|-----------------------------------------------------------------------------------------------------------------------------------------------------------------------------------|-------------------------------------------------------------------------------|----------------------------------------------------------------------------------------------------------------------------------------------------|------------------------------------------------------------|----------------------------------------------------------------------------------------------------------------------------------------------------|-------------------------------------------------------------------------------------------------------------------------------------------------------------------------------------------------------------------------------------------------------------------------------------------------------------------------------------------------------------------------------|-------------------------------------------------|
| <p>Sator-Katzenschlager et al. 2006 [67]</p> | <p>perioperativer Schmerz (Oozyten-Aspiration)</p>           | <p>pVNS: 2 x <u>Fossa triangularis</u>, Antitragus, links oder rechts<br/>vs.<br/>Sham-pVNS 1: inaktives Gerät<br/>vs.<br/>Sham-pVNS 2: nadellose Elektroden, inaktives Gerät</p> | <p>n=94<br/><br/>pVNS=32 (0)<br/>Sham-pVNS 1=32 (0)<br/>Sham-VNS 2=29 (1)</p> | <p>P-Stim (Biegler)<br/><br/>Rechteck, monophasisch, alternierende Polarität, 1 Hz, 1 ms, 3.8V (2 mA) konstant, 3h ON/3h OFF</p>                   | <p>Start 30 Min vor Eingriff bis 1h nach Eingriff-Ende</p> | <p>Schmerzlinderung (<b>VAS</b>) während bzw. nach Eingriff in pVNS-Gruppe signifikant größer im Vergleich zu beiden Sham-Gruppen (p&lt;0.001)</p> | <p>subjektives <b>Wohlbefinden</b> in pVNS-Gruppe signifikant besser während und nach Eingriff (p&lt;0.005)<br/><br/><b>Opioidkonsum</b> (Remifentanyl) signifikant niedriger (p&lt;0.001) in pVNS-Gruppe<br/><br/>Patient*innen in <b>Sham-pVNS 2</b> (ohne Nadelelektroden) waren signifikant <b>müder</b> (p&lt;0.001)<br/><br/>Übelkeit in allen Gruppen vergleichbar</p> | <p>keine behandlungsrelevanten UEs</p>          |
| <p>Likar et al. 2007 [45]</p>                | <p>postoperativer Schmerz (laparoskopische Nephrektomie)</p> | <p>pVNS: <u>Cymba Conchae</u>, <u>Fossa triangularis</u>, Antitragus<br/>vs.<br/>Sham-pVNS: inaktives Gerät</p>                                                                   | <p>n=44<br/><br/>pVNS=21 (1)<br/>Sham-pVNS=20 (2)</p>                         | <p>P-Stim (modifiziert; Biegler)<br/><br/>Rechteck, monophasisch, alternierende Polarität, 1 Hz, 20 ms, Amplitude unterschwellig, 3h ON/3h OFF</p> | <p>Start 30 Min vor Eingriff, 96h gesamt</p>               | <p>pVNS vs. Sham-pVNS: bessere <b>Ruhe-VAS</b> und <b>Belastungs-VAS-Werte</b>, insbesondere in der 1. Stunde nach Eingriff (p&lt;0.05)</p>        | <p>postoperative <b>Einnahme von Morphinhydrochlorid</b> signifikant geringer pVNS vs. Sham-pVNS (p&lt;0.05)<br/><br/>erster <b>Analgetikabedarf signifikant später</b> pVNS vs. Sham-pVNS (p&lt;0.05)</p>                                                                                                                                                                    | <p>Übelkeit und Erbrechen (pVNS/Sham n=5/1)</p> |

|                                    |                                                   |                                                                                                                                                                                            |                                                                      |                                                                                                                                                               |                                        |                                                                                                                                                                    |                                                                                             |                                                                                                               |
|------------------------------------|---------------------------------------------------|--------------------------------------------------------------------------------------------------------------------------------------------------------------------------------------------|----------------------------------------------------------------------|---------------------------------------------------------------------------------------------------------------------------------------------------------------|----------------------------------------|--------------------------------------------------------------------------------------------------------------------------------------------------------------------|---------------------------------------------------------------------------------------------|---------------------------------------------------------------------------------------------------------------|
| Michalek-Sauberer et al. 2007 [48] | postoperativer Schmerz (Backenzahn-Extraktion)    | pVNS: <u>Ohrläppchen, Fossa triangularis, Cavum Conchae</u> , links oder rechts<br>vs.<br>vs.<br>Sham-pVNS 1: inaktives Gerät<br>vs.<br>Sham-pVNS 2: nadellose Elektroden, inaktives Gerät | n=128<br><br>pVNS=48 (15)<br>Sham-pVNS 1=26 (8)<br>Sham-VNS 2=26 (5) | P-Stim (modifiziert; Biegler)<br><br>Rechteck, monophasisch, alternierende Polarität, 2/100 Hz alternierend alle 3s, 1 ms, 3.8V (2 mA) konstant, 3h ON/3h OFF | Start 30 Min vor Eingriff, 48 Stunden  | moderate bis schwere Schmerzdauer nicht signifikant unterschiedlich in den Gruppen<br><br>keine signifikanten Unterschiede in der wahrgenommenen Schmerzintensität | keine Unterschiede bei der Einnahme analgetischer Medikamente (Paracetamol, Mefenaminsäure) | Synkope (pVNS/Sham n=1/0)<br>Ohrenschmerz durch Stimulation (pVNS/Sham n=7/2)<br>Müdigkeit (pVNS/Sham n=10/3) |
| Kager et al. 2009 [35]             | postoperativer Schmerz (Tonsillektomie)           | pVNS: <u>Fossa triangularis, Antitragus, Tuberculum auriculare</u><br>vs.<br>Sham-pVNS: inaktives Gerät                                                                                    | n=33<br><br>pVNS=16 (0)<br>Sham-pVNS=17 (0)                          | P-Stim (modifiziert; Biegler)<br><br>Rechteck, monophasisch, alternierende Polarität, 1 Hz, 20 ms, Amplitude unerschwellig, 3h ON/3h OFF                      | Start 30 Min vor Eingriff, 96h Stunden | <b>VAS</b> signifikant niedriger pVNS vs. Sham-pVNS 9 (p=0.044), 12 (p=0.022) und 24h (p=0.045) postoperativ                                                       | Sham-pVNS hatte einen höheren Analgetikabedarf ggb. pVNS (nicht signifikant)                | Übelkeit und Erbrechen (n=6)                                                                                  |
| Holzer et al. 2011 [31]            | postoperativer Schmerz (gynäkologische Eingriffe) | pVNS: <u>Fossa triangularis, Antitragus, 1 individueller Punkt</u><br>vs.<br>Sham-pVNS: nadellose Elektroden, inaktives Gerät                                                              | n=40<br><br>pVNS=20 (0)<br>Sham-VNS=20 (0)                           | P-Stim (Biegler)<br><br>Rechteck, monophasisch, alternierende Polarität, 1 Hz, 1 ms, 3.8V (2 mA) konstant, 3h ON/3h OFF                                       | Start postoperativ für 72 Stunden      | keine signifikanten Unterschiede im VAS                                                                                                                            | keine signifikanten Unterschiede beim Analgetikabedarf                                      | k.A.                                                                                                          |

|                               |                                                 |                                                                                                                                                          |                                                             |                                                                                                                                  |                                                      |                                                                                                                                                                                                                                                                        |                                                                                                                                                   |                                          |
|-------------------------------|-------------------------------------------------|----------------------------------------------------------------------------------------------------------------------------------------------------------|-------------------------------------------------------------|----------------------------------------------------------------------------------------------------------------------------------|------------------------------------------------------|------------------------------------------------------------------------------------------------------------------------------------------------------------------------------------------------------------------------------------------------------------------------|---------------------------------------------------------------------------------------------------------------------------------------------------|------------------------------------------|
| Tsang et al. 2011 [74]        | postoperativer Schmerz (Hysterektomie)          | tVNS: 2 x <u>Fossa triangularis</u> , <u>Crus antihelicis</u> , Helix, Antitragus vs. Sham-tVNS: Ohrläppchen, bilateral vs. keine Intervention: Bettruhe | n=48<br>tVNS=16 (0)<br>Sham-tVNS=16 (0)<br>Kontrolle=16 (0) | IC-4107 (ITO)<br><br>Rechteck, biphasisch, 1 Hz, 0.05-0.15 ms, Amplitude individuell eingestellt                                 | bilateral jeder Stimulationspunkt für je 90 Sekunden | signifikante Reduktion bei <b>VAS</b> tVNS ggb. Ausgangswert (p<0.05) und tVNS vs. Kontrolle (p<0.05)<br><br>keine signifikanten Verbesserungen bei PEFR                                                                                                               | k.A.                                                                                                                                              | keine                                    |
| Chakravarthy et al. 2019 [14] | postoperativer Schmerz (Sectio)                 | pVNS: Antitragus, <u>Crus antihelicis</u> , <u>Fossa triangularis</u> vs. Standardtherapie                                                               | n=100<br>pVNS=47 (3)<br>Kontrolle=49 (1)                    | ANSiStim (DyAnsyst)<br><br>Rechteck, monophasisch, alternierende Polarität, 1Hz, 1 ms, 3.8V (2mA) konstant, 3h ON/3h OFF         | Start etwa 1 Stunde nach Eingriff für 48 Stunden     | <b>NRS-</b> Schmerzintensität signifikant niedriger pVNS vs. Kontrolle<br><br>geringerer Bedarf an Schmerzmedikation in der pVNS-Gruppe vs. Kontrolle<br><br>37 von 50 Patient*innen bewerteten die Verträglichkeit als gut, 12 als akzeptabel, 1 als nicht akzeptabel | k.A.                                                                                                                                              | Anlegen des Geräts nicht toleriert (n=1) |
| Ahmed et al. 2021 [1]         | postoperativer Schmerz (Roux-en-Y Magen-Bypass) | pVNS: <u>Tragus</u> , Scapha, Helix (posterior), Ohrläppchen (Referenzelektrode) vs. historische Kontrollgruppe (Standardtherapie)                       | n=18<br>pVNS=8 (0)<br>Kontrolle=10 (0)                      | NSS-2 BRIDGE (NBD; Innovative Health Solutions)<br><br>Rechteck, 1/10 Hz alternierend alle 2s, 1 ms, 3.2V konstant, 2h ON/2h OFF | Start nach Eingriff für 5 Tage (120h)                | 60.2% Reduktion in orale Morphinäquivalentdosis postoperativ in den ersten 24h pVNS vs. Kontrolle (p=0.063)<br><br>keine Unterschiede bei Nicht-Opiat-Analgetika                                                                                                       | 28% Schmerzreduktion (p=0.1) 24h postoperativ pVNS vs. Kontrolle<br><br>keine Unterschiede bei PONV<br><br>88% (n=7) Patient*innen bewerteten die | k.A.                                     |

|                       |                                                          |                                                                                                                   |                                         |                                                                                                                                      |                                                  |                                                                                                                                                                                                                                                                                                                                               |                                                                                                                                                                                                                                                                                             |                                             |
|-----------------------|----------------------------------------------------------|-------------------------------------------------------------------------------------------------------------------|-----------------------------------------|--------------------------------------------------------------------------------------------------------------------------------------|--------------------------------------------------|-----------------------------------------------------------------------------------------------------------------------------------------------------------------------------------------------------------------------------------------------------------------------------------------------------------------------------------------------|---------------------------------------------------------------------------------------------------------------------------------------------------------------------------------------------------------------------------------------------------------------------------------------------|---------------------------------------------|
|                       |                                                          |                                                                                                                   |                                         |                                                                                                                                      |                                                  |                                                                                                                                                                                                                                                                                                                                               | Verträglichkeit als exzellent                                                                                                                                                                                                                                                               |                                             |
| Blank et al. 2021 [7] | postoperativer Schmerz (kolorektale operative Eingriffe) | pVNS: 2 x <u>Crus helicis</u> , Helix (posterior), Ohrläppchen (Referenzelektrode) vs. Sham-pVNS: inaktives Gerät | n=54<br>pVNS=28 (0)<br>Sham-pVNS=24 (2) | NSS (EAD, MFS, BRIDGE; Innovative Health Solutions)<br><br>Rechteck, 1/10 Hz alternierend alle 2s, 1 ms, 3.2V konstant, 2h ON/2h OFF | Start kurz vor Eingriff für 5 Tage (120 Stunden) | kein Unterschied bei oraler Morphinäquivalentdosis pVNS vs. Sham-pVNS<br><br>Subgruppenanalyse: Vorteil für Patient*innen nach <b>offenem Eingriff</b> , signifikant geringere <b>orale Morphinäquivalentdosis</b> (p = 0.0278), ebenso bei Patient*innen 60-70 und >70 Jahre im Vergleich zu Altersgruppen 30-40, 40-50, 50-60 (p = 0.01092) | generelle Abnahme im STAI<br><br>keine signifikanten Unterschiede bei Übelkeit<br><br><b>reduzierte Schmerzen NRS</b> an Tag 3 nach OP pVNS vs. Sham-pVNS (p = 0.0340)<br><br>generelle Zufriedenheit mit pVNS-Anwendung (8.2 ± 2.6 von 10)<br><br>Zeitpunkt Spitalsentlassung vergleichbar | hartnäckige Übelkeit (pVNS/Sham-pVNS n=2/3) |

|                         |                                       |                                                                                                                          |                                         |                                                                                                                             |                                                                          |                                                                                                                          |                                                                                                                                                                                                                                                                                                                                                                                                                                                                                                                                         |       |
|-------------------------|---------------------------------------|--------------------------------------------------------------------------------------------------------------------------|-----------------------------------------|-----------------------------------------------------------------------------------------------------------------------------|--------------------------------------------------------------------------|--------------------------------------------------------------------------------------------------------------------------|-----------------------------------------------------------------------------------------------------------------------------------------------------------------------------------------------------------------------------------------------------------------------------------------------------------------------------------------------------------------------------------------------------------------------------------------------------------------------------------------------------------------------------------------|-------|
| Chelly et al. 2022 [15] | postoperativer Schmerz (Nierenspende) | pVNS: <u>Tragus</u> , Scapha, Helix (posterior), Ohrläppchen (Referenzelektrode), links oder rechts vs. Standardtherapie | n=20<br>pVNS=10 (0)<br>Kontrolle=10 (0) | NSS-2-BRIDGE (Innovative Health Solutions)<br><br>Rechteck, 1/10 Hz alternierend alle 2s, 1 ms, 3.2V konstant, 2h ON/2h OFF | Start nach Eingriff für 5 Tage (120 Stunden)<br><br>Follow-Up für 7 Tage | pVNS bewirkte eine 75.4% Reduktion der <b>oralen Morphinäquivalentdosis</b> (p=0.03) 24h postoperativ pVNS vs. Kontrolle | 57%<br><b>Schmerzreduktion NRS</b> (p<0.05) nach 24h und 73.3%<br>Schmerzreduktion nach 48h (p=0.0004) pVNS vs. Kontrolle<br><br>kein Unterschied bei Einnahme von nicht-Opioid-Analgetika<br><br>Trend von geringerer PONV mit Reduktion von benötigten Ondansetron pVNS vs. Kontrolle<br><br>50% <b>frühere Überstellung</b> auf Ambulanz/Station (p=0.02) pVNS vs. Kontrolle<br><br>Zeitpunkt Spitalsentlassung vergleichbar<br><br>Behandlungstoleranz pVNS (n=9) wurde als exzellent (78%), gut (11%) und annehmbar (11%) bewertet | keine |
|-------------------------|---------------------------------------|--------------------------------------------------------------------------------------------------------------------------|-----------------------------------------|-----------------------------------------------------------------------------------------------------------------------------|--------------------------------------------------------------------------|--------------------------------------------------------------------------------------------------------------------------|-----------------------------------------------------------------------------------------------------------------------------------------------------------------------------------------------------------------------------------------------------------------------------------------------------------------------------------------------------------------------------------------------------------------------------------------------------------------------------------------------------------------------------------------|-------|

**akuter/experimenteller Schmerz**

|                               |                                                                                       |                                                                                                                            |                                            |                                                                                                                                           |                                                                                                                                                           |                                                                                                                                                                                         |                                                                                                                                            |                                                                                                                                                                                                                                                                                               |
|-------------------------------|---------------------------------------------------------------------------------------|----------------------------------------------------------------------------------------------------------------------------|--------------------------------------------|-------------------------------------------------------------------------------------------------------------------------------------------|-----------------------------------------------------------------------------------------------------------------------------------------------------------|-----------------------------------------------------------------------------------------------------------------------------------------------------------------------------------------|--------------------------------------------------------------------------------------------------------------------------------------------|-----------------------------------------------------------------------------------------------------------------------------------------------------------------------------------------------------------------------------------------------------------------------------------------------|
| <p>Busch et al. 2013 [11]</p> | <p>akuter Schmerz (experimenteller Hitzeschmerz)<br/><br/>gesunde Proband*innen</p>   | <p>tVNS: <u>Conchae</u>, links<br/>vs.<br/>Sham-tVNS: inaktives Gerät</p>                                                  | <p>n=48<br/><br/>tVNS/Sham-tVNS=48 (0)</p> | <p>STV02 (Cerbomed)<br/><br/>Rechteck, monophasisch, 25 Hz, 0.250 ms, 0.25 – 10 mA (individuell)</p>                                      | <p>2 Einheiten zu je 1 h</p>                                                                                                                              | <p>erhöhte Schmerzschwelle bei mechanischem und Druckschmerz tVNS vs. Sham-tVNS<br/><br/>signifikant <b>reduzierte Schmerzen</b> bei tonischen Hitzereizen über 5 min.</p>              | <p>keine relevanten Änderungen bei Atem- oder Herzaktivität<br/><br/>keine klinisch relevanten Nebenwirkungen während tVNS beobachtbar</p> | <p>leichter Schmerz (tVNS/Sham-tVNS n=2/1)<br/>Druckgefühl (tVNS/Sham-tVNS n=8/6)<br/>Prickeln (tVNS/Sham-tVNS n=12/2)<br/>Jucken (tVNS/Sham-tVNS n=10/1)<br/>Kitzeln (tVNS/Sham-tVNS n=7/2)<br/>merkwürdiges Gefühl (tVNS/Sham-tVNS n=1/0)<br/>Schluckbeschwerden (tVNS/Sham-tVNS n=1/0)</p> |
| <p>Laqua et al. 2014 [44]</p> | <p>akuter Schmerz (experimentelle Schmerzschwelle)<br/><br/>gesunde Proband*innen</p> | <p>tVNS: <u>Cavum Conchae</u>, bilateral, Referenzelektrode auf Mastoid Knochen<br/>vs.<br/>Sham-tVNS: inaktives Gerät</p> | <p>n=22<br/><br/>tVNS/Sham-tVNS=21 (1)</p> | <p>TNS SM 2MF (Schwa-medico)<br/><br/>Rechteck, biphasisch, Burstmodus, 2/100 Hz alternierend, 0.2 ms, maximal tolerierbare Amplitude</p> | <p>2 Studieneinheiten je 35 Min<br/><br/>5 Schmerzschwellwertmessungen/Einheit (Ausgangswert vor Stimulation, 15/30/40/60 min nach Stimulationsstart)</p> | <p>keine Unterschiede bei Schmerzschwellwerten (PT) zwischen den Einheiten<br/><br/>15 Proband*innen reagierten mit einem <b>erhöhter Schmerzschwelle</b> tVNS vs. Sham (p&lt;0.01)</p> | <p>Herzrate und Blutdruck blieben unverändert</p>                                                                                          | <p>Synkope aufgrund von Bradikardie und Hypotonie (tVNS/Sham-tVNS n=1/0)</p>                                                                                                                                                                                                                  |

|                            |                                                                             |                                                                      |                                   |                                                                                                                    |                                                              |                                                                                                                                                                                                                                                                                         |                                                                                                                                                                                        |       |
|----------------------------|-----------------------------------------------------------------------------|----------------------------------------------------------------------|-----------------------------------|--------------------------------------------------------------------------------------------------------------------|--------------------------------------------------------------|-----------------------------------------------------------------------------------------------------------------------------------------------------------------------------------------------------------------------------------------------------------------------------------------|----------------------------------------------------------------------------------------------------------------------------------------------------------------------------------------|-------|
|                            |                                                                             |                                                                      |                                   |                                                                                                                    |                                                              | weitere 6 Proband*innen berichteten von <b>herabgesetzter Schmerzschwelle</b> tVNS vs. Sham (p<0.05)                                                                                                                                                                                    |                                                                                                                                                                                        |       |
| Frøkjær et al. 2016 [27]   | akuter Schmerz, Darmmotilität<br><br>gesunde Proband*innen                  | tVNS: <u>Cymba Conchae</u> , links vs. Sham-tVNS: Ohrläppchen, links | n=18<br><br>tVNS/Sham-tVNS=18 (0) | NEMOS (Cerbomed)<br><br>Rechteck, monophasisch, 30 Hz, 0.25 ms, individuelle Amplitude (0.1-10 mA)                 | 60 min Stimulation mit 2x10 min tiefer langsamer Atemtechnik | tVNS vs. Sham-tVNS erhöht die <b>Schmerzschwelle</b> gegenüber <b>Knochenschmerz</b> (p=0.001)<br><br>kein signifikanter Effekt bei Muskelschmerz                                                                                                                                       | der kardiale <b>vagale Tonus</b> stieg während aktiver tVNS vs. Sham-tVNS an (p=0.009)                                                                                                 | keine |
| Usichenko et al. 2017 [75] | akuter Schmerz (experimenteller Hitze-Schmerz)<br><br>gesunde Proband*innen | tVNS: <u>Conchae</u> , bilateral vs. Sham-tVNS: inaktives Gerät      | n=20<br><br>tVNS/Sham-tVNS=20 (0) | TENS Gerät (Eigenkonstruktion)<br><br>Rechteck, 8 Hz, 0.2 ms, individuell deutlich wahrnehmbare Amplitude (~7.6mA) | 45 Min/Einheit                                               | in der Gesamtanalyse kein Effekt auf Schmerzschwelle<br><br>Untergruppenanalyse zeigte bei 8 Proband*innen signifikant <b>erhöhte Schmerzgrenze</b> nach tVNS vs. Sham-tVNS (p=0.024)<br><br>12 Proband*innen signifikant <b>erniedrigte Schmerzgrenze</b> tVNS vs. Sham-tVNS (p=0.012) | 8 Responder zeigten während tVNS ein schwächeres fMRI-Signal im rechten Caudate Nucleus, dem vmPFC, der linken anterioren Insel, und dem linken Hypothalamus im Vergleich zu Sham-tVNS | k.A.  |

|                           |                                                                                      |                                                                                                                                                           |                                                                                                                                                                                        |                                                                                                                                           |                                                                                                             |                                                                                                                                                                                                                                                                 |                                                                                                                                                                |      |
|---------------------------|--------------------------------------------------------------------------------------|-----------------------------------------------------------------------------------------------------------------------------------------------------------|----------------------------------------------------------------------------------------------------------------------------------------------------------------------------------------|-------------------------------------------------------------------------------------------------------------------------------------------|-------------------------------------------------------------------------------------------------------------|-----------------------------------------------------------------------------------------------------------------------------------------------------------------------------------------------------------------------------------------------------------------|----------------------------------------------------------------------------------------------------------------------------------------------------------------|------|
| Janner et al. 2018 [33]   | akuter Schmerz (experimenteller Hitze-Schmerz)<br><br>gesunde Proband*innen          | keine Intervention vs. tVNS: <u>Cymba Conchae</u> , links und rechts vs. Sham-tVNS 1: Ohrläppchen vs. Sham-tVNS 2: <u>Cymba Conchae</u> , inaktives Gerät | n=51<br><br>keine Intervention/tVNS/Sham-tVNS 1/Sham-tVNS 2=49 (2)                                                                                                                     | PuntoBravo (Medizintechnik Rostock)<br><br>Rechteck, Blöcke zu 9 Impulsen, 100 Hz, 0.2 ms, 2x/Sek (gemischtes Frequenzmuster, 100Hz/ 2Hz) | Start 20 Min vor Beginn des Hitzereizes je 25 Min/Einheit<br><br>repetitive Hitzestimulation                | <b>Schmerzintensität VAS</b> war geringer in allen Interventionsgruppen im Vergleich zur Gruppe ohne Intervention (p<0.001)<br><br>hypoalgetischer Effekt/Effekt auf TSP zeigte geschlechtsspezifische Unterschiede                                             | Individuelle Schmerztoleranz-Temperaturen und STAI-Werte waren vergleichbar unter allen experimentellen Bedingungen                                            | k.A. |
| Farmer et al. 2020 [22]   | akuter Schmerz (ösophagealer Schmerz Hypersensibilität)<br><br>gesunde Proband*innen | tVNS: <u>Cymba Conchae</u> , links vs. Sham-tVNS: Ohrläppchen, links                                                                                      | Exp. 1: n <sub>1</sub> =34 (19*) tVNS/Sham-tVNS=15 (0)<br><br>Exp. 2: n <sub>2</sub> =25 (7*) tVNS/Sham-tVNS=18 (0)<br><br>*Non-Sensitizers wurden nach Klassifizierung ausgeschlossen | NEMOS (Cerbomed)<br><br>Rechteck, 25 Hz, 0.1 ms, mA individuell auf deutliche, Wahrnehmbarkeit, 30s ON/30s OFF                            | 25 Min/Einheit<br><br>Exp.1: Stimulation während Säureinfusion<br><br>Exp.2: Stimulation nach Säureinfusion | Exp.1: tVNS <b>verhindert</b> die Entstehung von säureinduzierter ösophagealer <b>Hypersensibilität</b> (p=0.004) vs. Sham-tVNS<br><br>Exp. 2: tVNS <b>reversiert</b> die säureinduzierte ösophageale <b>Schmerz-Hypersensibilität</b> (p=0.0001) vs. Sham-pVNS | Exp. 1: <b>kardialer vagaler Tonus</b> Anstieg tVNS vs. Sham-tVNS (p=0.016)<br><br>Exp. 2: <b>kardialer vagaler Tonus</b> Anstieg tVNS vs Sham-tVNS (p = 0.03) | k.A. |
| Dumoulin et al. 2021 [19] | akuter experimenteller Schmerz<br><br>gesunde Proband*innen                          | tVNS: <u>Cymba Conchae</u> , links vs. Sham-tVNS: Ohrläppchen, links                                                                                      | Exp. 1: n <sub>1</sub> =22 tVNS/Sham-tVNS=22<br><br>Exp. 2: n <sub>2</sub> =15 tVNS/Sham-tVNS=15                                                                                       | NEMOS (Cerbomed)<br><br>Rechteck, monophasisch, 25 Hz, 0.25 ms, Amplitude individuell auf deutliche Wahrnehmbarkeit, 30s ON /30s OFF      | 3h (Exp.1) bzw. 1h (Exp.2)                                                                                  | weder tVNS noch Sham-tVNS zeigten einen Effekt auf zerebrale und Verhaltensaspekte von somatosensorischer Perzeption                                                                                                                                            | k.A.                                                                                                                                                           | k.A. |

<sup>a</sup> Abkürzungen: ADL – Activities of Daily Living; BPI – Brief Pain Inventory; CSBM – Complete Spontaneous Bowel Movements; DAS28-CRP – Disease Activity Score-28 with C-Reactive Protein; FDI – Functional Disability Inventory; FIHOA - Functional Index for Hand Osteoarthritis; FU – Follow-up; HAQ-DI – Health Assessment Questionnaire Disability Index; HIT-6 – Headache Impact Test; IBS-SSS – Irritable Bowel Syndrome-Severity Scoring System; ITT – Intention-To-Treat; MIDAS - Migraine Disability Assessment; mPFC – Medial Prefrontal Cortex; MSQ – Migraine-specific QoL Questionnaire; NRS – Numeric Rating Scale; PANAS – Positive and Negative Affect Scale; PEFr – Peak Expiratory Flow Rate; PFSD – Pain Frequency-Severity-Duration; PGA – Physician Global Assessment; PoCG – postcentral gyrus; PONV – post-operative Übelkeit und Erbrechen; PP – per Protokoll; PtGA – patient global assessment; PSS – perceived stress scale; SAS/SDS – self-rating anxiety scale/self-rating depression scale; pVNS – perkutane Vagusnervstimulation; SCL –skin conductance level; SFG – superior frontal gyrus; STAI – State-Trait Anxiety Inventory; STAI-C – State-Trait Anxiety Inventory for Children; TENS – transkutane elektrische Nervenstimulation; tVNS – transkutane Vagusnervstimulation; VAS – visuelle Analogskala; WCC – ways of coping checklist.

<sup>b</sup> Unterstrichene Lokalisationen im Ohr in der Methode kennzeichnen vagal innervierte Bereich.

<sup>c</sup> Fett hervorgehobene Textteile in den primären & sekundären Ergebnissen kennzeichnen statistisch signifikante Veränderungen.
